# Supplementary material
Source: Research Square preprint supplement (doi:10.21203/rs.3.rs-8802979/v1)
Supplement: Supplementary file 1 [file dd4438795a522d6d5e1fe9c8.docx]

**Harnessing PT Symmetry in 1D Defective Photonic Crystals for Enhanced Sensing**

Charumathi P R and Senthilnathan K

Photonics Research Lab, Department of Physics, School of Advanced Sciences

Vellore Institute of Technology, Vellore, Tamil Nadu, India

[Senthilnathan.k@vit.ac.in](mailto:Senthilnathan.k@vit.ac.in)

**Supplementary Data**

The refractive index and absorption coefficient of PEG 600 are presented as functions of frequency using polynomial fitting as follows [1, 2]:

For 0 % of PEG (water):

|  | (1) |
| --- | --- |
|  | (2) |

For 20 % of PEG

|  | (3) |
| --- | --- |
|  | (4) |

For 40 % of PEG

|  | (5) |
| --- | --- |
|  | (6) |

For 60 % of PEG

|  | (7) |
| --- | --- |
|  | (8) |

For 80 % of PEG

|  | (9) |
| --- | --- |
|  | (10) |

For 100 % of PEG

|  | (11) |
| --- | --- |
|  | (12) |

**References:**

1. Musina, G.R., Gavdush, A.A., Chernomyrdin, N. V., Dolganova, I.N., Ulitko, V.E., Cherkasova, O.P., Kurlov, V.N., Komandin, G.A., Zhivotovskii, I. V., Tuchin, V. V., Zaytsev, K.I.: Optical Properties of Hyperosmotic Agents for Immersion Clearing of Tissues in Terahertz Spectroscopy. Optics and Spectroscopy. 128, 1026–1035 (2020).

2. Musina, G.R., Dolganova, I.N., Chernomyrdin, N. V., Gavdush, A.A., Ulitko, V.E., Cherkasova, O.P., Tuchina, D.K., Nikitin, P. V., Alekseeva, A.I., Bal, N. V., Komandin, G.A., Kurlov, V.N., Tuchin, V. V., Zaytsev, K.I.: Optimal hyperosmotic agents for tissue immersion optical clearing in terahertz biophotonics. Journal of Biophotonics. 13, (2020).
